1 **Title**

2 Career Choice, Gender, and Mentor Impact: Results of the U.S. National Postdoc Survey

3

4 **Authors**

5 Sean C. McConnell<sup>1\*</sup>, Erica L. Westerman<sup>2\*+</sup>, Joseph F. Pierre<sup>3</sup>, Erin J. Heckler<sup>4</sup>, Nancy B.  
6 Schwartz<sup>1</sup>

7

8 **Affiliations**

9 University of Chicago<sup>1</sup>, University of Arkansas<sup>2</sup>, University of Tennessee Health Sciences  
10 Center<sup>3</sup>, Washington University in St. Louis<sup>4</sup>

11 \*Contributed equally

12 <sup>+</sup>Corresponding author: Erica L. Westerman, ewesterm@uark.edu

13

14 **Keywords**

15 postdoctoral researcher, mentorship, career development, research workforce, institutional policy

16

17

18

19 **Abstract**

20 The postdoctoral community is an essential component of the academic and scientific workforce.  
21 As economic and political pressures impacting these enterprises continue to change, the postdoc  
22 experience has evolved from short, focused periods of training into often multidisciplinary,  
23 extended positions with less clear outcomes. As efforts are underway to amend U.S. federally  
24 funded research policies, the paucity of postdoc data has made evaluating the impact of policy  
25 recommendations challenging. Here we present comprehensive survey results from over 7,600  
26 postdocs based at 351 academic and non-academic U.S. institutions in 2016. In addition to  
27 demographic and salary information, we present multivariate analyses on the factors that  
28 influence postdoc career plans and mentorship satisfaction in this population. We further analyze  
29 gender dynamics and expose wage disparities and career choice differences. Academic research  
30 positions remain the predominant career choice of postdocs in the U.S., although unequally  
31 between postdocs based on gender and residency status. Receiving mentorship training during  
32 the postdoctoral period has a large, positive effect on postdoc mentorship satisfaction. Strikingly,  
33 the quality of and satisfaction with postdoc mentorship appears to also heavily influence career  
34 choice. The data presented here are the most comprehensive data on the U.S. postdoc population  
35 to date. These results provide an evidence basis for informing government and institutional  
36 policies, and establish a critical cornerstone for quantifying the effects of future legislation aimed  
37 at the academic and scientific workforce.

38

39

40

## 41 **Introduction**

42 Postdoctoral training offers doctoral recipients a temporary period of mentored or scholarly  
43 experience, considered highly productive within scientific and academic communities. Such  
44 training is also ostensibly valuable for postdocs, who gain additional experience to help pursue  
45 their chosen career paths. Tenure-track faculty positions, however, are now estimated to  
46 represent a small percentage of postdoc career outcomes (~15%)<sup>1,2</sup>. This has led to proposals to  
47 support training postdocs for additional roles beyond tenure-track faculty positions, and  
48 additional efforts by the National Institutes of Health (NIH), National Science Foundation (NSF),  
49 and National Academies of Sciences, Engineering, and Medicine to increase mentor  
50 accountability<sup>2-6</sup>. Persistent concerns with increasingly long periods of postdoctoral training, lack  
51 of appropriate career guidance beyond the professoriate, and comparatively low postdoctoral  
52 salaries, have also led to repeated calls to reform the postdoctoral training model<sup>7-12</sup>. Despite  
53 these concerns, comprehensive data for postdocs are not routinely collected<sup>2,4</sup>. Indeed, reliable  
54 data on such basic information as the number of postdocs have been lacking, or disputed, in part  
55 due to difficulties in collecting these data because of lack of job title standardization, postdoc  
56 mobility, and the ad hoc nature of institutional postdoctoral administration<sup>2,5,12-14</sup>.

57

58 Possibly for these very reasons, the postdoctoral experience has not been comprehensively  
59 surveyed nationally in over a decade, following the Sigma Xi “Doctors without Orders” survey  
60 report in 2005, which was based on postdoc respondents from 46 participating institutions<sup>8</sup>.  
61 Nevertheless, recent data collection efforts have provided insights into the postdoctoral  
62 experience<sup>5,8,9,14-19</sup>. For example, the pilot phase of the NSF Early Career Doctorates Survey

63 studied the breadth of the doctoral population at U.S. academic institutions, including  
64 postdoctoral researchers (31%), young faculty (54%), and scientists in non-postdoctoral  
65 positions<sup>18</sup>. Yet, to date comprehensive survey data specifically targeting the postdoctoral period  
66 and including postdoctoral researchers with PhDs granted both inside and outside the U.S., as  
67 well as data regarding postdoc career plans, mentor satisfaction, and demographics are still  
68 largely lacking<sup>2,4</sup>. To address these gaps, and to research those without clear institutional  
69 oversight, we took a grass-roots approach to conduct a postdoc-led survey of U.S. postdoctoral  
70 researchers. We asked postdoctoral researchers a number of questions associated with  
71 professional and career development, mentoring, career choice, lifestyle, and demographics (for  
72 details see Materials and Methods and Data S1-S3). The purpose of this work was to capture a  
73 comprehensive snapshot of the postdoctoral experience in a manner that was both broad and  
74 informative, with high diversity in questions and topics covered, in the number of institutions,  
75 and in the breadth of postdoctoral experiences included.

76

## 77 **Results and Discussion**

78 To collect data from institutions with a wide range of support for postdocs, we took a multi-level  
79 approach to recruit survey participants. We used publicly available contact information for  
80 university leadership, postdoctoral administrators, postdoctoral societies and associations, and  
81 asked these people in leadership positions to disseminate our survey to all postdocs at their  
82 institutions. In total, we contacted individuals at 482 institutions most likely to have postdocs,  
83 including universities, research institutions, museums, and government labs. We obtained  
84 respondents from 351 institutions. In addition to direct contact with institutions, we also used a

85 grass-roots survey dissemination approach, promoted a website describing the survey that could  
86 be freely shared on social media and by email, and contacted professional societies to encourage  
87 survey dissemination. Using these combined approaches, we collected 7,673 individual  
88 responses into a secure REDCap database (IRB Protocol Number 15-1724), which, after quality  
89 control to remove respondents from non-U.S. institutions, provided a final dataset of 7,603  
90 respondents (see Materials and Methods for details). As one of our goals was to reach as many  
91 postdocs as possible, survey dissemination was not randomized to any specific subset. Responses  
92 from institutions with long-standing postdoctoral affairs offices were anticipated to be over-  
93 represented in our dataset (see Materials and Methods for more information). Nevertheless, our  
94 respondents represented all 50 states, including a large fraction of respondents from institutions  
95 without well-established offices for postdoctoral support. While the majority of respondents  
96 represented STEM disciplines, which traditionally employ the most postdocs, 8.4% reported  
97 their primary fields as humanities, psychology, or social sciences (Table S3).

98

99 Our postdoc respondents were 49% U.S. citizens and 51% non-U.S. citizens (Fig. 1 and Table  
100 S2). The majority were 30-34 years of age (54.5%), and 1-3 years from receipt of their doctorate  
101 (63.1%), matching their reported years of postdoctoral experience (Fig. 1 and Table S2). The  
102 majority (55%) described their primary field of study as life sciences. There were small, but  
103 significant, differences in primary field by geographic region (Fig. 2 and Table S3). Race and  
104 ethnicity were self-reported with 60.3% White/Caucasian, 24.8% Asian/Asian American, 6.6%  
105 Hispanic/Latino, and 2.6% Black/African American (Table S2). Both national and international  
106 postdocs were included in these proportions. Our respondents were 53% female, while the

107 gender ratio of their mentors was skewed towards males (71% male; Fig. 1), consistent with the  
108 most recent AAUP Gender Equity report where full-time faculty are majority (61%) male<sup>20</sup>.

109

110 While the demographics of our survey respondents may differ slightly from those of the actual  
111 postdoctoral population (but see Materials and Methods for analysis suggesting lack of response  
112 bias), confirmation of a lack of response bias remains difficult as there are currently no gold-  
113 standard datasets of postdocs in the U.S. for comparison, due to the previously mentioned  
114 broader lack of oversight and barriers to reaching postdocs. That being said, the unique  
115 characteristics of our dataset, including approximately equal representation (similar sample  
116 sizes) of men and women, as well as U.S. citizens and non-U.S. citizens, facilitated our  
117 comparative analyses of the postdoctoral experiences of these different groups, which we report  
118 below.

119

120 Our data indicate that gender has a significant effect on the postdoc experience (Fig. 1). Men  
121 were paid more than women (Male average: \$47,678.00, Female average: \$46,477.43, n=7,516,  
122  $\chi^2=62.337$ , p<0.0001). Men were more likely to have a same-gender mentor (i.e. a same-gender  
123 role model) (Male: 77.3%, Female: 35.4%, n=7,459,  $\chi^2=144.352$ , p<0.0001). Men were more  
124 likely to be non-U.S. citizens (Male: 42% U.S. citizens, 52% temporary visas, 6% permanent  
125 residents; Female: 56% U.S. citizens, 38% temporary visas, 6% permanent residents; n=7,543,  
126  $\chi^2=169.709$ , p<0.0001). In addition, a small but significantly higher proportion of male postdocs  
127 were married/partnered (Male: 68.3%, Female: 63.2%, n=7,538,  $\chi^2=21.693$ , p<0.0001) and/or  
128 have children (Male: 31.0%, Female: 22.3%, n=7,532,  $\chi^2=71.561$ , p<0.0001). The gender

129 disparity in pay occurs even after male and female postdocs were matched in age, years since  
130 graduation, mentor satisfaction, and likelihood of being married/partnered (nominal logistic  
131 model, gender effect test  $n=7,311$ ,  $\chi^2=47.235$ ,  $p<0.0001$ , Table S4). This gender wage gap  
132 increased with postdoc age but not with partnership status, partially supporting previous analyses  
133 of the STEM gender wage gap<sup>20,21</sup>. Male postdocs were also more likely than women to have  
134 received PhD degrees in Engineering ( $n=620$ ,  $\chi^2=76.652$ ,  $p<0.0001$ ) or the Physical Sciences  
135 ( $n=846$ ,  $\chi^2=77.466$ ,  $p<0.0001$ ), two fields which have historically higher salaries<sup>22</sup>. Interestingly,  
136 female postdocs trended towards being paid less than men in all fields except the Physical  
137 Sciences, where women trended towards being paid slightly more than men (Table S5). Income,  
138 mentor gender, citizenship, and partner status are all factors that may contribute to the observed  
139 gender difference in interest in primarily research-focused academic careers<sup>22</sup> (Fig. 1 & 3G).

140

141 Most postdocs reported salaries in the range of \$39,000 - \$55,000 (median \$43,750; mean  
142 \$46,988,  $n=7,551$ ). In the 2014 National Postdoctoral Association's Institutional Policy Report,  
143 52% of the 74 institutions reported their minimum stipend matched the current NIH NRSA  
144 minimum<sup>17</sup>. At the time of this survey, the NIH minimum<sup>23</sup> was \$43,692, which matches well  
145 with \$43,750, the reported median income in our study. Five percent of postdocs reported mean  
146 gross incomes of less than \$39,000 and ~10% reported incomes above \$55,000. Although  
147 salaries in high cost of living (COL) urban areas tend to be higher than average (Table S6), when  
148 adjusted to publicly available COL data, postdocs in large metropolitan areas earn significantly  
149 less money than postdocs in college towns or rural settings (average salary when adjusted for  
150 cost of living, metropolitan: \$38,045.60, non-metropolitan: \$44,714.40;  $n=7,551$ , F-ratio: 12.614,  
151  $p=0.0002$ ) (Fig. 2, Table S6). "The Postdoctoral Experience Revisited" 2014 report

152 recommended as a best practice that the minimum salary be set at \$50,000; however, this has not  
153 been enacted at most institutions or by funding agencies<sup>3</sup>. During the months that our survey was  
154 open (February – September 2016), the effect of a proposed minimum salary update (\$47,476) to  
155 the Fair Labor Standards Act (FLSA) on postdoctoral salaries was openly debated, but ultimately  
156 not federally mandated<sup>24</sup>. Our data suggest that setting a minimum salary for postdocs is  
157 particularly important for postdoctoral researchers in large metropolitan areas, where salaries are  
158 not maintaining parity with cost of living increases.

159

160 The majority of postdocs indicated research-focused academic careers as their primary long term  
161 career plan (57.7%), with industry research a distant second (17.8%, Fig. 1J and Table S2).

162 Determining the “why” of career choice remains the subject of much study<sup>2,4,5</sup>. To assess which  
163 factors were most influential for determining postdoc career plan in our dataset, (categorized in  
164 this survey as: academia, primarily research based; academia, primarily teaching based; industry;  
165 government/non-profit; other) we conducted a nominal logistical model with 26 factors  
166 concerning topics considered to be important for postdoc success and career choice (Table S7),  
167 which include demographics, training, productivity and mentor support matrices. The 14  
168 significant factors in the model were (in order of effect size): 1) whether postdoc career plans  
169 had changed; 2) whether training in pedagogy was received; 3) feelings of career preparedness;  
170 4) perceived mentor support of career plan; 5) primary field of study; 6) residency status in the  
171 U.S.; 7) intensity of job search; 8) postdoc gender; 9) number of first, last, or corresponding  
172 author publications; 10) number of conferences attended in the past year; 11) hours worked per  
173 week; 12) total number of publications while a postdoc; 13) mentor rank; and 14) desire to  
174 pursue a career in the U.S. (Table 1). Perceived mentor support, number of postdoc publications,



175 hours worked per week, conferences attended, and postdoc feelings of career preparedness were  
176 all positively correlated with choice to pursue a research-focused academic career (Fig. 3A, C-F).  
177 Male postdocs, and postdocs who were not U.S. citizens, were more interested in academic  
178 research positions (Fig. 3G & 3H). In contrast, postdocs with mentors outside of the  
179 professoriate were more likely to prefer government/non-profit positions (Fig. 3B). Whether this  
180 is a cause or effect relationship is not clear in our study, though we did find that postdocs with  
181 non-academic mentors changed their career plans at the same rate as those with academic  
182 mentors ( $n=7,361$ ,  $\chi^2=6.860$ ,  $p=0.077$ ). In addition, postdocs actively searching for permanent  
183 positions were less interested in academic research than postdocs not yet on the job market (Fig.  
184 3I), and were more likely to have changed their career plans ( $n=7,565$ ,  $\chi^2=224.633$ ,  $p<0.0001$ ).  
185 These results complement recent studies suggesting that individual career choice is influenced by  
186 changing job attribute preferences and self-awareness<sup>22</sup>, and that academic success is influenced  
187 by mentorship during the postdoctoral period<sup>26</sup>.

188

189 Sixty percent of respondents were satisfied with the mentorship they receive, with similar  
190 responses from both genders (Fig. 1I). To assess which factors were most influential for  
191 determining postdoc mentor satisfaction, we conducted a nominal logistic model with the same  
192 26 factors included in the model for postdoc career choice (though excluding mentor satisfaction  
193 as a factor, and replacing it with postdoc long term career plan) (Table S7). The 8 significant  
194 factors in the model (in order of effect size) were: 1) feelings of career preparedness; 2)  
195 perceived mentor support of career plan; 3) frequency of project meetings with mentor; 4)  
196 intensity of job search; 5) whether training in mentorship was received; 6) primary field of study;  
197 7) perception of job market; and 8) academic rank of mentor (Table 2). These factors were more

198 important than number of postdoc publications, whether a postdoc had changed career plans,  
199 postdoc or mentor gender, residency status, or training in either grant writing or pedagogy.

200

201 Perceived mentor support had a positive effect on mentor satisfaction, as did frequency of  
202 mentor meetings, perception of preparedness for desired future career, and perception of job  
203 market (Fig. 4A-D). Receiving mentor training also had a large positive effect on postdoc mentor  
204 satisfaction (Fig. 4E). We found this to be particularly noteworthy, as mentorship training is not  
205 a common part of the postdoctoral experience, with only 26% of postdocs reporting that they  
206 have received such training.

207

208 Previous research on a postdoc cohort showed that high mentorship satisfaction and perceived  
209 support correlated with increased interest in an academic research focused career<sup>27</sup>. In addition,  
210 in a randomized, controlled study, a different type of mentoring, “group career coaching,” was  
211 found to increase both perceived “achievability” and “desirability” of academic careers in an  
212 under-represented minority student group<sup>28</sup>. While our data do not show a significant correlation  
213 between gender and mentor satisfaction, they do suggest that an increase in mentor support and  
214 mentorship training may increase female and under-represented postdocs’ pursuit of research-  
215 intensive academic careers.

216

217 **Conclusions**

218 In summary, our dataset represents the most comprehensive survey of the U.S. postdoctoral  
219 population in over a decade. As such, these data may provide a benchmark for legislation and  
220 institutional policy makers, inform research questions pertaining to the evolving postdoctoral  
221 population, and serve as a precedent for understanding the important dynamics of the scientific  
222 workforce. We found that a research-focused academic position remains the most common  
223 primary career goal for postdocs, in spite of increasing emphasis on other types of careers for  
224 doctorate holders<sup>4,10,29</sup>. Although sixty percent of respondents were satisfied with the mentoring  
225 that they receive, our data suggest that inclusion of formal mentorship training for postdocs may  
226 significantly increase mentor satisfaction and influence career choice<sup>28</sup>. Our data also show that  
227 women are less interested in research-focused academic positions than men, and this may be  
228 associated with gender specific differences in postdoctoral experiences<sup>30</sup>.

229

230 While the data we collected allowed us to identify a number of factors influencing the  
231 postdoctoral experience, other factors, such as socioeconomic background and underrepresented  
232 status may also play a significant role, and should be studied further. Nevertheless, our findings  
233 highlight the impact of mentoring, across all demographics, as essential to informing career  
234 choice and determining quality of postdoctoral experience.

235

## 236 **Materials and Methods**

237

### 238 **Survey instrument design**

239 The National Postdoc Survey questions were designed to emphasize aspects of the postdoctoral  
240 experience related to career choice and mentoring, in addition to collection of basic  
241 demographics. These questions were based on over a decade of experience with postdoctoral  
242 surveys administered at the University of Chicago, led by postdocs within the Biological  
243 Sciences Division Postdoctoral Association. In an effort to maximize participation for all  
244 postdocs, regardless of institutional environment, we disseminated the survey using top-down  
245 and grassroots methods described below.

246

247 We conducted the survey in two phases, a 15-institution pilot phase followed by a national  
248 rollout to over 450 institutions. The pilot phase was launched on February 2, 2016 after  
249 contacting and inviting participation from administrators at the 15 member schools of the  
250 Committee on Institutional Cooperation (CIC, now the Big Ten Academic Alliance plus the  
251 University of Chicago). 272 postdocs participated in the pilot phase of the survey. Feedback  
252 about the survey design was solicited during a workshop about the survey presented at the  
253 National Postdoc Association Annual meeting on March 4, 2016. The pilot survey questions  
254 (Data S1) were then slightly modified before nationwide launch on March 31, 2016. These  
255 revisions included additional demographic questions, and rephrasing of several questions to  
256 improve clarity (Data S2 and S3). The revised survey was available from March 31- September  
257 2, 2016. While the CIC institutions participated in the pilot version of this survey, the survey was  
258 also open to postdocs at CIC institutions after the national rollout. A majority of participants  
259 from CIC institutions responded after March 31, 2016 and took the final version of the survey  
260 rather than the pilot version.

261

262 For the top-down survey dissemination approach, a team of five postdocs and two administrators  
263 compiled contacts for all doctoral degree and research institutions in the U.S. that were thought  
264 to have postdoctoral researchers. We gathered publically available contact information for  
265 Postdoctoral Offices, Postdoctoral Associations, as well as Offices of Research, Deans of  
266 Graduate Schools, Provosts and any other administrators that may represent postdocs for each  
267 institution (including website, email addresses, names) via web search. Whenever an institution  
268 did not have a postdoctoral office, we tried to determine who had oversight over postdoctoral  
269 researchers such as a representative from an Office of Research, Graduate School, or a Provost  
270 Office. We used this information to simultaneously contact those who we determined were most  
271 likely to represent postdocs at each University, including any listed postdoc contacts. Multi-  
272 respondent emails were sent to the above described representatives at each institution. These  
273 individuals were again invited to participate during the months of April, June, July, and August,  
274 and contact lists were revised to update contact information, and include additional institutions  
275 expected to have postdocs.

276

277 For our grass-roots survey dissemination approach we launched a website that could be freely  
278 shared on social media and by email, which explained the survey aims and contained a  
279 centralized contact form. The contact form allowed any postdocs who had not been reached via  
280 standard institutional contacts to participate in the survey through this secondary means of  
281 contact. In addition, we periodically checked contact information for institutional

282 representatives, and updated the contact information, added new institutional contacts, and  
283 encouraged grass-roots survey dissemination during the seven months that the survey was active.

284

285 In all, 482 sets of putative postdoctoral oversight representatives were contacted by email,  
286 although some larger institutions such as Harvard University and NIH often housed separate  
287 institutes or offices that were each contacted separately - in these cases 5 and 30 sets,  
288 respectively. During the seven months (February 2-September 2, 2016) that the survey was open,  
289 over 7,600 postdoc responses were collected, with respondents from every state, and from 351  
290 institutions and universities. While the number of respondents varied between months (ranging  
291 from 24 during the two days the survey was open in September to 2,268 in August), there was no  
292 statistical difference in the gender ratio of respondents over the seven months (whole dataset:  
293 53.1% female and 46.9% male  $\pm 5$ ,  $n=7,579$ ,  $\chi^2=10.703$ ,  $p=0.1521$ ; excluding non-U.S. postdocs:  
294 53.1% female and 46.9% male  $\pm 5$ ; F:M,  $n=7,560$ ,  $\chi^2=10.866$ ,  $p=0.1446$ ). Respondents from the  
295 46 institutions that participated in the 2005 Sigma Xi survey, representing institutions with long-  
296 standing institutional support for postdocs, contributed 3,126 responses, slightly less than half of  
297 all respondents. This indicates that our addition of a grassroots approach to survey dissemination  
298 contributed to a broader sampling of postdocs across different institutional environments,  
299 providing an even more comprehensive assessment of U.S. postdoctoral experiences.

300

301 Four institution classifications were added as fixed variables to the final dataset: institution  
302 classification as public or private, Carnegie classification, U.S. Census Region, and participation  
303 in the 2005 Sigma Xi Postdoctoral Survey. City and state of each institution were also added.

304

## 305 **Statistical analysis**

306 Raw response data were quality-filtered to select for U.S.-based institutions and individuals who  
307 were currently in self-described postdoctoral positions. Of the 7,673 total respondents, 70 were  
308 removed from the initial dataset using these quality filters, yielding a final dataset of 7,603 U.S.  
309 postdoctoral respondents. The demographics data shown (Fig. 1) were calculated by first sorting  
310 by gender, and then sorting by the demographic of interest displayed as total percentage of  
311 respondents per gender (all panels except Fig. 1H) or by a mean +/- standard deviation (Fig. 1H)  
312 using Prism7 (GraphPad). The effect of gender on salary, having a same sex mentor, residency  
313 status, partner status, and having children was tested using a Pearson  $\chi^2$  test, n= 7,516, 7,459,  
314 7,543, 7,538, 7,532 respectively). Sample sizes differed because respondents were allowed to  
315 skip questions, and are therefore reported as “n” here and throughout. However, most  
316 respondents answered most survey questions, as can be seen by the similar sample sizes for  
317 these different survey questions. The effects of gender, age, years since graduation, mentor  
318 satisfaction, and likelihood of being partnered on postdoc salary were tested using a nominal  
319 logistic model, n=7,311. The effect of gender on being in the fields of engineering or the  
320 physical sciences was tested using a Pearson  $\chi^2$  test, engineering n=620, physical sciences  
321 n=846. We used a Bonferroni correction to account for multiple testing, yielding a significance  
322 threshold of p=0.006. All statistical tests were two-sided. Statistics were performed using JMP  
323 13.1 by SASS.

324

325 To determine what factors were significantly correlated with postdoctoral career choice and  
326 mentor satisfaction, we ran a nominal logistic model using 26 different fixed variables listed in  
327 Table S7 using the JMP 13.1 by SASS fit model platform. We then determined which factors  
328 were significant variables after controlling for multiple testing. These estimates of effect size are  
329 reported in Table 1 and Table 2. A total of 6,504 respondents answered all 26 of the questions  
330 included in this analysis.

331

### 332 **Cost of living and postdoc salaries**

333 Cost of living index (COL) data for 2016 was produced by the Council for Community and  
334 Economic Research (<https://www.c2er.org/>). State COL data were generated by averaging across  
335 all cities that have 2016 C2ER cost of living data provided per state. Average postdoc salary  
336 from all survey respondents for each state was divided by these state COL values to produce  
337 postdoc salaries adjusted by cost of living. Whenever income was not specified, the midpoint of  
338 income range selected by the respondent was used. These values were mapped to each state with  
339 red to blue corresponding to lowest to highest adjusted salary, respectively. In addition, counties  
340 with institutions having at least 50 respondents were then mapped separately, to map adjusted  
341 postdoc salary in 38 counties with additional COL data, against the background of the state COL  
342 data, in 50 states plus Washington D.C.

343

### 344 **Population proportion analysis**



345 To determine the number of individual responses required from a total population of 100,000 for  
346 95% and 99% confidence levels, at a 5% margin of error, assuming the true population  
347 proportion being measured is between 3-50% of the total population, we conducted a population  
348 proportion analysis using the equation and definitions as described in Tintle et al <sup>31</sup> and at Select  
349 Statistical Services Limited<sup>32</sup>. Results are reported in Table S1.

350

### 351 **Data analysis of survey respondent proportions**

352 Inconsistent definitions across institutions and lack of existing institutional contact lists for  
353 postdocs, particularly for those without postdoctoral offices and other support, can make  
354 collecting representative data for postdocs challenging<sup>12</sup>. Thus demographics of respondents may  
355 differ across surveys, and the postdoctoral demographics of previous survey datasets may differ  
356 from those observed in our study. To further assess our demographic data, we conducted the  
357 comparisons described below.

358

359 We compared our demographics to that of the 2005 Sigma Xi survey which is perhaps the most  
360 comparable effort to our own, having 7600 postdoc respondents, both citizens and noncitizens<sup>8</sup>.  
361 The 2005 Sigma Xi dataset had 42% female postdocs (51% female for U.S. citizens, and 35%  
362 female for internationals), and overall 46% U.S. citizen and permanent resident postdocs (54%  
363 temp visas). Our current survey dataset contains a higher percentage of both female postdocs  
364 (53% female) and U.S. citizen and permanent resident postdocs (55%) relative to the Sigma Xi  
365 survey from a decade ago, which may in part reflect changing demographics of the US  
366 postdoctoral population, as well difference in institutions sampled. However, the relative

367 difference in proportion of females for U.S. and non-U.S. citizens remains consistent  
368 (approximately 15%); our U.S. citizen respondents were 60% female, while our international  
369 respondents were 46% female.

370

371 An alternative explanation for this increase in female respondents in our dataset relative to the  
372 earlier Sigma Xi survey is that women may have disproportionately responded to our survey. We  
373 tested this hypothesis by checking the University of Chicago female and male response ratio  
374 against the actual sex ratio of female and male postdocs in the Biological Sciences. Our survey  
375 respondents from the University of Chicago were 49.3% female and 50.7% male, while the  
376 actual sex ratio of female and male postdocs in the University of Chicago Biological Sciences  
377 was 46.5% female and 53.5% male, which puts our survey respondent ratio well within the  
378 standard 5% margin of error. While it is unclear how representative University of Chicago  
379 postdocs are of the national postdoctoral population, it is important to remember that the  
380 surveyed population, by definition, all have advanced degrees, work at research institutions, and  
381 are all highly likely to have strong command of the English language, even if it is not their first  
382 language. Doctorate recipients make up 2% of the U.S. national population<sup>33</sup>. As doctorates are a  
383 small percentage of the national population, they are likely to make up a small percentage of  
384 respondents to general national surveys. Thus response biases of surveys targeting this  
385 population may differ from those targeting the general population.

386

387

388

## 389   **References**

- 390   1. Larson, R.C., Ghaffarzdegan, N., Xue, Y. Too many PhD graduates or too few academic job  
391       openings: The basic reproductive number  $R_0$  in Academia. *Systems Research and Behavioral*  
392       *Science* **31**(6) 745-750 (2014) [doi: 10.1002/sres.2210](https://doi.org/10.1002/sres.2210)
- 393
- 394   2. National Academy of Sciences, National Academy of Engineering, and Institute of Medicine.  
395       The postdoctoral experience revisited. Washington, DC: *The National Academies Press*  
396       (2014) [doi.org/10.17226/18982](https://doi.org/10.17226/18982)
- 397
- 398   3. Institute of Medicine, National Academy of Sciences, and National Academy of Engineering.  
399       Enhancing the postdoctoral experience for scientists and engineers: A guide for postdoctoral  
400       scholars, advisers, institutions, funding organizations, and disciplinary societies. Washington,  
401       DC: *The National Academies Press* (2000) [doi.org/10.17226/9831](https://doi.org/10.17226/9831)
- 402
- 403   4. The National Academies of Sciences, Engineering, and Medicine. The next generation of  
404       biomedical and behavioral sciences researchers: breaking through. Washington, DC: *The*  
405       *National Academies Press* (2018) [doi.org/10.17226/25008](https://doi.org/10.17226/25008)
- 406
- 407   5. National Institutes of Health. Biomedical Research Workforce Working Group Report (2012)  
408       [https://acd.od.nih.gov/documents/reports/bmw\\_report.pdf](https://acd.od.nih.gov/documents/reports/bmw_report.pdf)
- 409

- 410 6. Meyers, F.J., Mathur, A., Fuhrmann, C.N., O'Brien, T.C., Wefes, I., Labosky, P.A., Duncan,  
411 D.S., August, A., Feig, A., Gould, K.L., Friedlander, M.J., Schaffer, C.B., Van Wart, A.,  
412 Chalkley, R. The origin and implementation of the Broadening Experiences in Scientific  
413 Training programs: an NIH common fund initiative. *FASEB Journal* **30**(5) 507-514 (2016)  
414 [doi: 10.1096/fj.15-276139](https://doi.org/10.1096/fj.15-276139)  
415
- 416 7. National Research Council. Invisible university: Postdoctoral education in the United States.  
417 report of a study conducted under the auspices of the National Research Council. [Richard B.  
418 Curtis, Study Director]. Washington, DC: The National Academies Press (1969)  
419 [doi.org/10.17226/18693](https://doi.org/10.17226/18693)  
420
- 421 8. Davis, G. Doctors without orders. *American Scientist* **93**, 3, Supplement (2005)  
422 <http://postdoc.sigmaxi.org/results/>  
423
- 424 9. Sauermann, H., Roach, M. Why pursue the postdoc path? *Science* **352** (6286), 663-4 (2016)  
425 [doi: 10.1126/science.aaf2061](https://doi.org/10.1126/science.aaf2061)  
426
- 427 10. Alberts, B., Kirschner, M.W., Tilghman, S., Varmus, V. Rescuing biomedical research from  
428 its systemic flaws. *PNAS* **111** (16), 5773-5777 (2014) [doi: 10.1073/pnas.1404402111](https://doi.org/10.1073/pnas.1404402111)  
429
- 430 11. Gould, J. The postdoc series: The plight of the postdoc. *Nature Jobs Blog* 15 March (2015)  
431 <http://blogs.nature.com/naturejobs/2015/03/16/the-postdoc-series-the-plight-of-the-postdoc/>

432

433 12. Schaller, M.D., *et al.* Point of view: What's in a name? *eLife* 6:e32437 (2017) [doi:](https://doi.org/10.7554/eLife.32437)

434 [10.7554/eLife.32437](https://doi.org/10.7554/eLife.32437)

435

436 13. Daniels, R. A generation at risk: Young investigators and the future of the biomedical

437 workforce. *PNAS* **112**(2) 313-318 (2015) [doi: 10.1073/pnas.1418761112](https://doi.org/10.1073/pnas.1418761112)

438

439 14. Pickett, C., Bankston, A., McDowell, G.S. The GSS is an unreliable indicator of biological

440 sciences postdocs population trends. *bioRxiv* (2017) [doi.org/10.1101/171314](https://doi.org/10.1101/171314)

441

442 15. Heggeness, M.L., Gunsalus, K.T., Pacas J., McDowell, G.S. Preparing for the 21st century

443 biomedical research job market: Using census data to inform policy and career decision-

444 making - Version 1. *SJS* (21 Dec. 2016) <http://www.sjscience.org/article?id=570>

445

446 16. Gibbs, K.D., McCreedy, J., Griffiths, K. Career development among American biomedical

447 postdocs. *CBE Life Sci Educ* **14** (4), 44 (2015) [doi: 10.1187/cbe.15-03-0075](https://doi.org/10.1187/cbe.15-03-0075)

448

449 17. Ferguson, K., Huang, B., Beckman, L., Sinche, M. National Postdoctoral Association

450 Institutional Policy Report (2014) [https://cdn.ymaws.com/npamembers.site-](https://cdn.ymaws.com/npamembers.site-ym.com/resource/resmgr/docs/npa_policyreport2014_final.pdf)

451 [ym.com/resource/resmgr/docs/npa\\_policyreport2014\\_final.pdf](https://cdn.ymaws.com/npamembers.site-ym.com/resource/resmgr/docs/npa_policyreport2014_final.pdf)

452

- 453 18. Phou, K. Profile of early career doctorates: 2015. NSF InfoBrief National Center for Science  
454 and Engineering Statistics NSF 17-313 (2017) <https://www.nsf.gov/statistics/2017/nsf17313/>  
455
- 456 19. Kahn, S., Ginther, D.K. The impact of postdoctoral training on early careers in biomedicine.  
457 *Nature Biotech* **35**, 90-94 (2017) [doi:10.1038/nbt.3766](https://doi.org/10.1038/nbt.3766)  
458
- 459 20. Association of American University Professors (AAUP). AAUP Faculty Gender Equity  
460 Indicators 2006. [https://www.aaup.org/reports-publications/publications/see-all/aaup-faculty-](https://www.aaup.org/reports-publications/publications/see-all/aaup-faculty-gender-equity-indicators-2006)  
461 [gender-equity-indicators-2006](https://www.aaup.org/reports-publications/publications/see-all/aaup-faculty-gender-equity-indicators-2006)  
462
- 463 21. Athanasiadou, R., Bankston, A., Carlisle, M., Niziolek, C., McDowell, G. Assessing the  
464 Landscape of U.S. Postdoc Salaries. *bioRxiv* (2018) [doi.org/10.1101/227694](https://doi.org/10.1101/227694)  
465
- 466 22. Buffington, C., Harris, B.C., Jones, C., Weinberg, B.A. STEM training and early career  
467 outcomes of female and male graduate students: Evidence from UMETRICS data linked to  
468 the 2010 Census. *Am Econ Rev* **106** (5), 333-338 (2016) [doi: 10.1257/aer.p20161124](https://doi.org/10.1257/aer.p20161124)  
469
- 470 23. Ruth L. Kirschstein National Research Service Awards (NRSA) postdoctoral stipends,  
471 training related expenses, institutional allowance, and tuition/fees effective for fiscal year  
472 2017. <https://grants.nih.gov/grants/guide/notice-files/NOT-OD-17-003.html>  
473
- 474 24. Benderly, B.L. A year-end bait and switch. *Science Careers* (2016) [doi:](https://doi.org/10.1126/science.caredit.a1700002)  
475 [10.1126/science.caredit.a1700002](https://doi.org/10.1126/science.caredit.a1700002)

476

477 25. Roach, M., Sauermann, H. The declining interest in an academic career. *PLoS ONE* **12** (9):

478 e0184130 (2017) <https://doi.org/10.1371/journal.pone.0184130>

479

480 26. Lienard, J.F., Achakulvisut, T., Acuna, D.E., David, S.V. Intellectual synthesis in mentorship

481 determines success in academic careers *bioRxiv* (2018) [doi: 10.1101/273888](https://doi.org/10.1101/273888)

482

483 27. Scaffidi, A.K., Berman, J.E. A positive postdoctoral experience is related to quality

484 supervision and career mentoring, collaborations, networking and a nurturing research

485 environment. *Higher Educ* **62:685** (2011) [doi:10.1007/s10734-011-9407-1](https://doi.org/10.1007/s10734-011-9407-1)

486

487 28. Williams SN, Thakore BK, McGee R. Coaching to augment mentoring to achieve faculty

488 diversity: a randomized controlled trial. *Academic Medicine*. **91(8):1128-35** (2016) [doi:](https://doi.org/10.1097/ACM.0000000000001026)

489 [10.1097/ACM.0000000000001026](https://doi.org/10.1097/ACM.0000000000001026)

490

491 29. St. Clair R., *et al.* The “new normal”: Adapting doctoral trainee career preparation for broad

492 career paths in science. *PLoS ONE* **12** (5) e0177035 (2017)

493 [doi.org/10.1371/journal.pone.0177035](https://doi.org/10.1371/journal.pone.0177035)

494

495 30. Moss-Racusin, C.A., Dovidio, J.F., Brescoll, V.L., Graham, M.J., Handelsman, J. Science

496 faculty’s subtle gender biases favor male students. *PNAS* **109** (41), 16474-79 (2012). [doi:](https://doi.org/10.1073/pnas.1211286109)

497 [10.1073/pnas.1211286109](https://doi.org/10.1073/pnas.1211286109)

498

- 499 31. Tintle, N.L., Chance, B.L., Cobb, G.W., Rossman, A., Roy, S., Swanson, T.M.,  
500 VanderStoep, J.L. Introduction to Statistical Investigations (2016) John Wiley & Sons, Inc  
501
- 502 32. Select Statistical Services Limited. Population Proportion – Sample Size calculator (2018)  
503 <https://select-statistics.co.uk/calculators/sample-size-calculator-population-proportion/>  
504
- 505 33. United States Census Bureau. Educational Attainment of the Population 18 Years and  
506 Over, by Age, Sex, Race, and Hispanic Origin; Table 1-01 (2015)  
507 <https://www.census.gov/data/tables/2015/demo/education-attainment/p20-578.htm>  
508
- 509



510 **Supplementary Material** has been uploaded for this manuscript.

511

## 512 **Acknowledgements**

513 We thank Heather Titley and Giorgio Grasselli for assistance with survey instrument design and  
514 dissemination; Laurie Risner for assistance with the Big Ten Pilot Phase; and Dylan Meyer for  
515 assistance with data clean-up. We express deep gratitude to all postdocs who participated in this  
516 survey, as well as to the postdoctoral associations, administrators, and many others who helped  
517 disseminate our survey.

518

519 **Funding** The Center for Research Informatics is funded by the Biological Sciences Division at  
520 the University of Chicago and by the Institute for Translational Medicine, CTSA NIH UL1  
521 TR000430. This study was supported in part by the University of Chicago Biological Sciences  
522 Division Postdoctoral Association and Office of Graduate and Postdoctoral Affairs. The Big Ten  
523 Pilot Phase was supported through the National Research Mentoring Network – Committee on  
524 Institutional Cooperation Academic Network (NRMN-CAN) subaward 5101964-6.

525

## 526 **Author contributions**

527 SCM, ELW, EJH, and JFP designed the survey and analyzed data. ELW performed multivariate  
528 analysis and models. SCM, ELW, JFP, and EJH disseminated the survey. All authors contributed  
529 to writing and editing the manuscript.

530

531 **Competing interests**

532 Authors declare no competing interests.

533

534 **Data and materials availability**

535 Non-privileged data used in this study are available in supplemental tables. Due to their sensitive  
536 nature, much of the raw data are privileged to prevent individual identification, in accordance  
537 with IRB protocol.

538

539 **Figure Legends**

540

541 **Figure 1: Demographics of the Postdoc Population Surveyed.**

542 A) Postdoc gender, B) Mentor gender, C) Residency status, D) Partnered/Married, E) Has  
543 children, F) Age, G) Race/Ethnicity/Underrepresented status (which may include things other  
544 than race and ethnicity), H) Year of graduation, I) Adjusted income, by year of graduation, J)  
545 Postdoc satisfaction with mentor, K) Primary long-term career plans, and L) Primary  
546 field/discipline. Red bars indicate female, striped blue bars indicate male.

547

548 **Figure 2: Postdoc Cost of Living Adjusted Income and Field of Study by Region.**

549 A map of the United States with the range of reported postdoc gross income adjusted by cost of  
550 living (key on the left) and the respondents' field of study (key on the right) in each of the four  
551 major regions: West, Midwest, South, and Northeast (bold lines). The adjusted income data are  
552 provided at the state (and when data sufficient to support, county) level.

553

### 554 **Figure 3: Postdoc Career Choice.**

555 Here we illustrate the independent effects of the fourteen significant factors (out of twenty-six) in  
556 the nominal logistic regression model of best fit for postdoc primary career choice. In these  
557 mosaic plots, the panels show the listed factor and corresponding effect size, and the right-hand  
558 color key corresponds to primary career choice. Factors are paraphrased survey questions, please  
559 see Data S1 and S2 for specific wording of questions.

560

### 561 **Figure 4: Postdoc Mentor Satisfaction.**

562 Here we illustrate the independent effects of the eight significant factors (out of twenty-six) in  
563 the nominal logistic regression model of best fit for postdoc mentor satisfaction. In these mosaic  
564 plots, the panels show the listed factor and corresponding effect size, and the right-hand color  
565 key corresponds to the degree of mentor satisfaction. Factors are paraphrased survey questions,  
566 please see Data S1 and S2 for specific wording of questions.

567

568

569

570 **Table 1**

571

| Factor                                                      | $\chi^2$ | -log p-value |
|-------------------------------------------------------------|----------|--------------|
| Whether long term career plans have changed                 | 599.951  | 108.529      |
| Received training in pedagogy                               | 151.052  | 27.273       |
| Feelings of career preparedness                             | 161.510  | 11.925       |
| Perceived mentor support of career plan                     | 130.577  | 11.925       |
| Primary field of study                                      | 191.331  | 10.190       |
| Residency status in U.S.                                    | 133.264  | 9.941        |
| Job search intensity                                        | 98.574   | 9.352        |
| Postdoc gender                                              | 53.654   | 7.658        |
| Number of first, last, or corresponding author publications | 86.193   | 5.274        |
| Conferences attended in last year                           | 84.468   | 5.043        |
| Hours worked / week                                         | 109.093  | 4.870        |
| Total number of publications while a postdoc                | 80.503   | 4.524        |
| Academic rank of mentor                                     | 70.513   | 3.292        |
| Plan to pursue a career in U.S.                             | 37.452   | 2.340        |

572

573 **Table 1:** Significant factors influencing postdoc primary career plans. Whole model effect: n=6,504,  
574 Model  $R^2=0.2017$ , AICc=15924, BIC=21130.

575

576

577 **Table 2**  
578

| <b>Factor</b>                           | <b><math>\chi^2</math></b> | <b>-log p-value</b> |
|-----------------------------------------|----------------------------|---------------------|
| Feelings of career preparedness         | 960.457                    | 181.948             |
| Perceived mentor support of career plan | 904.891                    | 178.146             |
| Frequency of mentor meetings            | 532.31                     | 89.480              |
| Job search intensity                    | 68.255                     | 8.040               |
| Received training in mentorship         | 37.088                     | 6.240               |
| Primary field of study                  | 92.193                     | 4.368               |
| Perception of academic job market       | 48.088                     | 3.384               |
| Academic rank of mentor                 | 41.614                     | 2.508               |

579  
580 **Table 2:** Significant factors influencing postdoc satisfaction with mentoring. Whole model effect:  
581 n=6,504, Model  $R^2=0.3007$ , AICc=14729, BICc=17810.

582

583

584 **Figure 1**

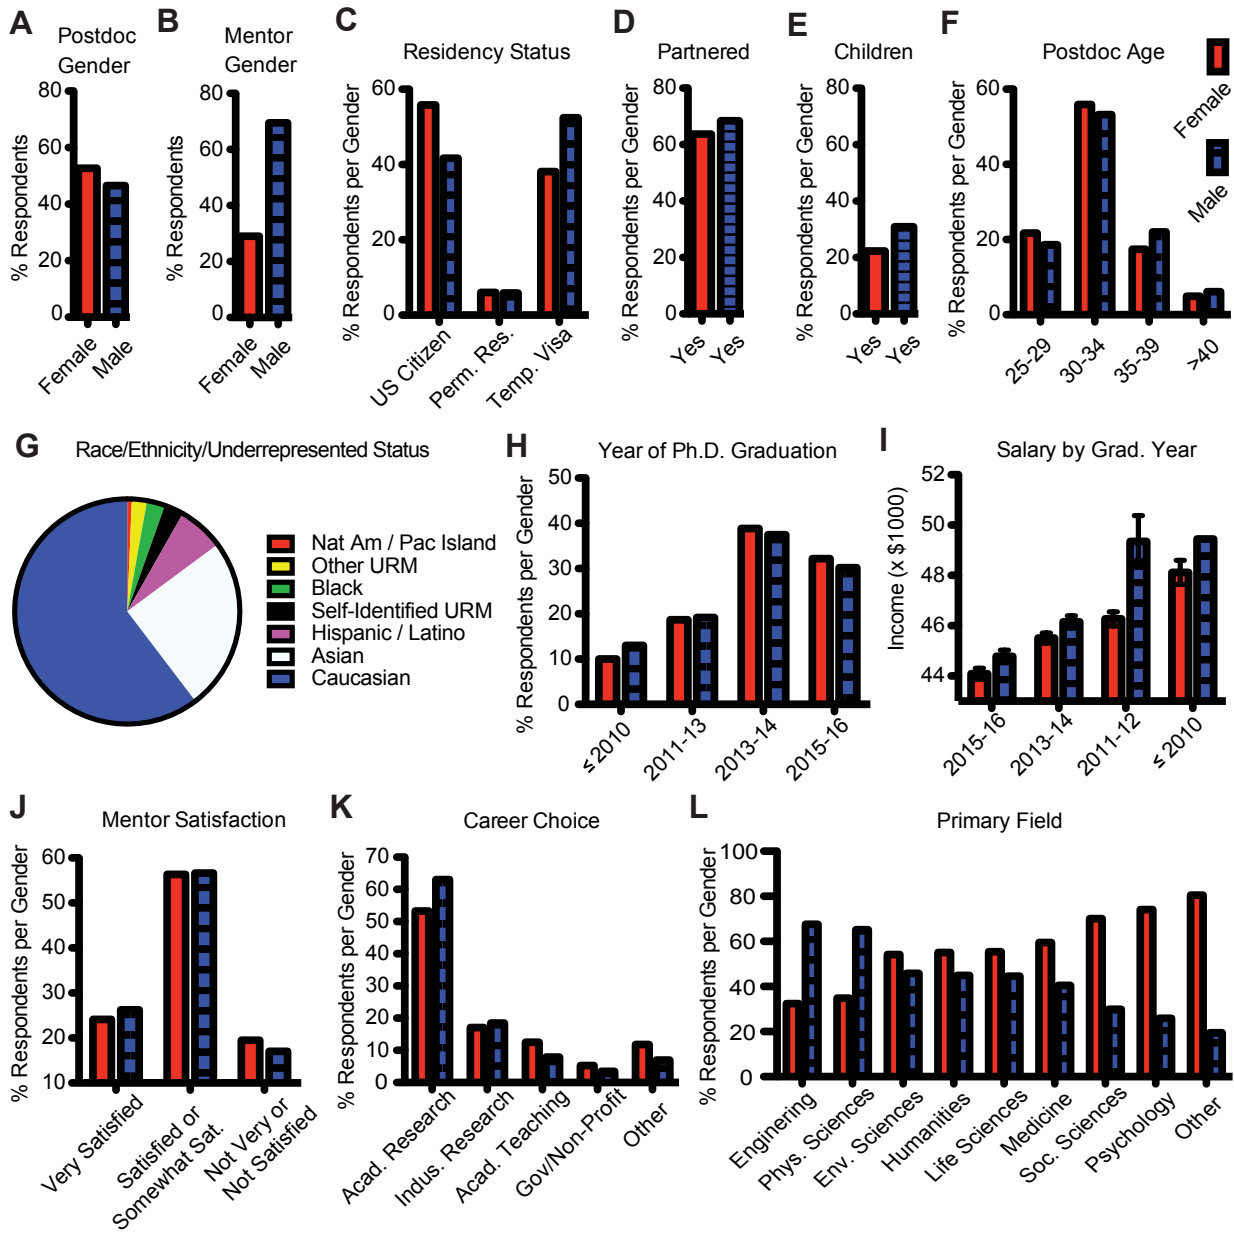

585

586

587 **Figure 2**

588

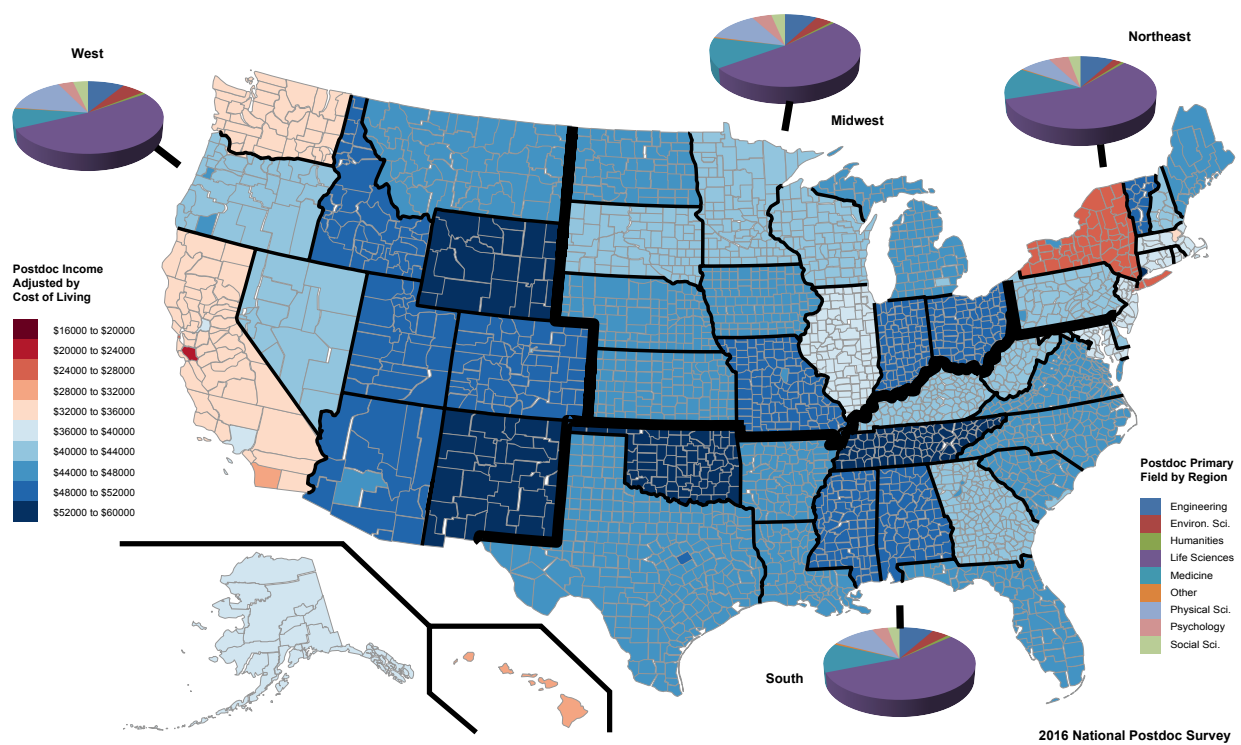

589

590

591 **Figure 3**

592

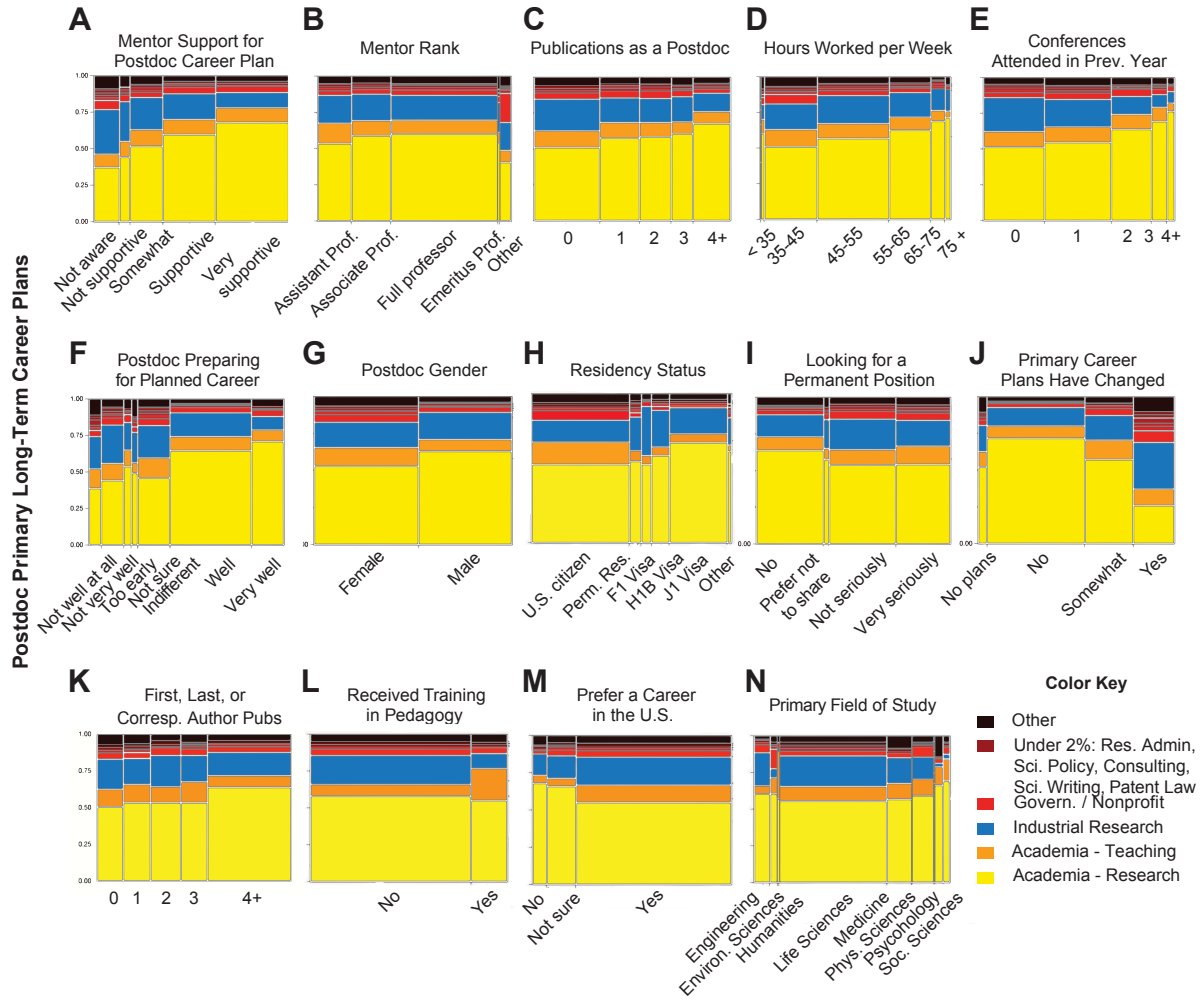

593

594



595 **Figure 4**

596

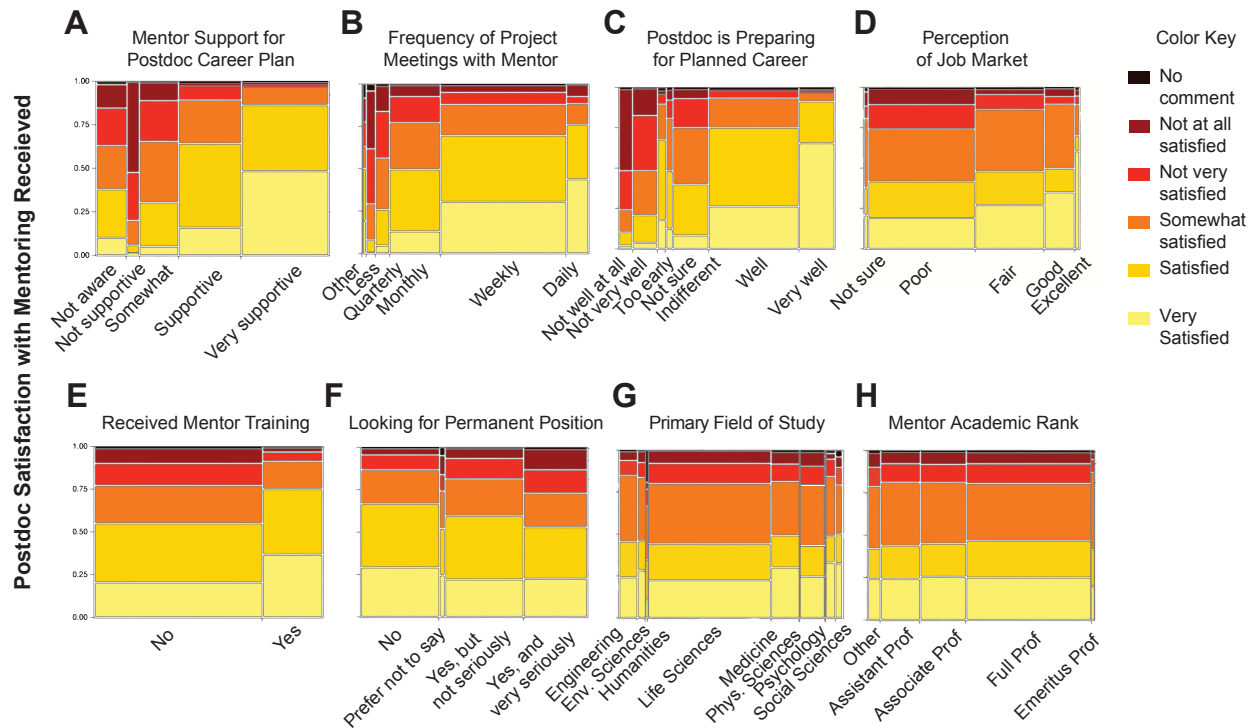

597

598

599

600

601

602

603

604

605
